# Supplementary material for: Identification of GLPG/ABBV-2737, a Novel Class of Corrector, Which Exerts Functional Synergy With Other CFTR Modulators
Source: PubMed Central journal article supplement (PMC6521598; doi:10.3389/fphar.2019.00514), 2019-05-09
Supplement: Data_Sheet_1.pdf [file Data_Sheet_1.pdf]

## Supplementary Material

# Identification of GLPG/ABBV-2737, a novel class of corrector, which exerts functional synergy with other CFTR modulators

Gert de Wilde, Maarten Gees, Sara Musch, Katleen Verdonck, Mia Jans, Anne-Sophie Wesse, Ashvani K. Singh, Tzyh-Chang Hwang, Thierry Christophe, Mathieu Pizzonero, Steven Van der Plas, Nicolas Desroy, Marlon Cowart, Pieter Stouten, Luc Nelles, Katja Conrath\*

\* **Correspondence:** Corresponding Author: [katja.conrath@glpg.com](mailto:katja.conrath@glpg.com)

### 1 Supplementary Figures

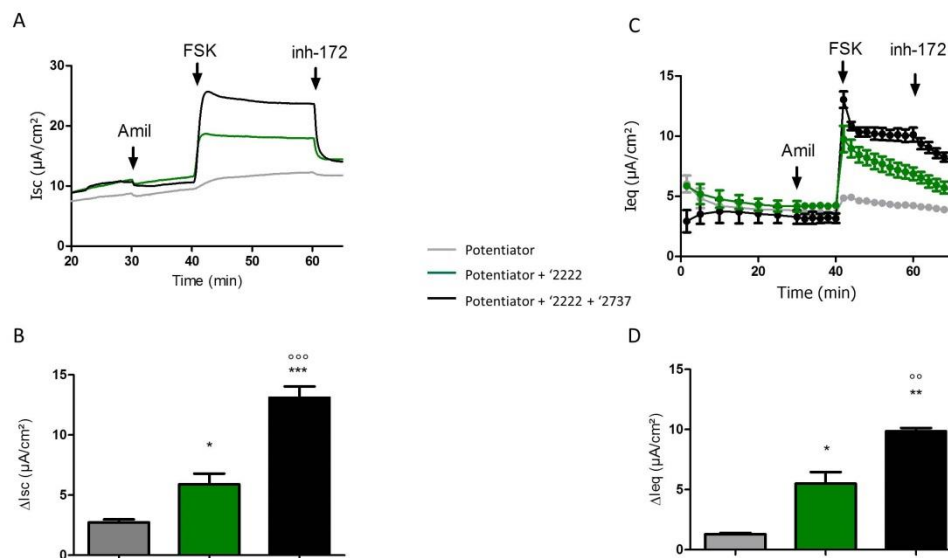

### Supplementary Figure 1.

Evaluation of GLPG2737 corrector activity in Ussing chamber and TECC on F508del/F508del HBE cells (donor BCF714). **A.** Average traces of Ussing chamber data of cells treated with either 2  $\mu\text{M}$  potentiator (grey); 2  $\mu\text{M}$  potentiator + 0.15  $\mu\text{M}$  GLPG2222 (green) or 2  $\mu\text{M}$  potentiator + 0.15  $\mu\text{M}$  GLPG2222 + 1  $\mu\text{M}$  GLPG2737 (black). **B.** Changes in short circuit current after stimulation with forskolin for the experiment shown in A ( $n = 3$  for each condition) **C.** traces of TECC data of cells treated with either Potentiator (grey); Potentiator + GLPG2222 (green) or Potentiator + GLPG2222 + GLPG2737 (black). ( $n = 3$  for each condition) **D.** Area under Curve calculations. Potentiator used was GLPG2451. p values are denoted with \* compared to DMSO and with  $^{\circ}$  compared to GLPG2222 + potentiator (one symbol meaning  $p < 0.05$ , 2  $p < 0.01$  and 3  $p < 0.0001$ )

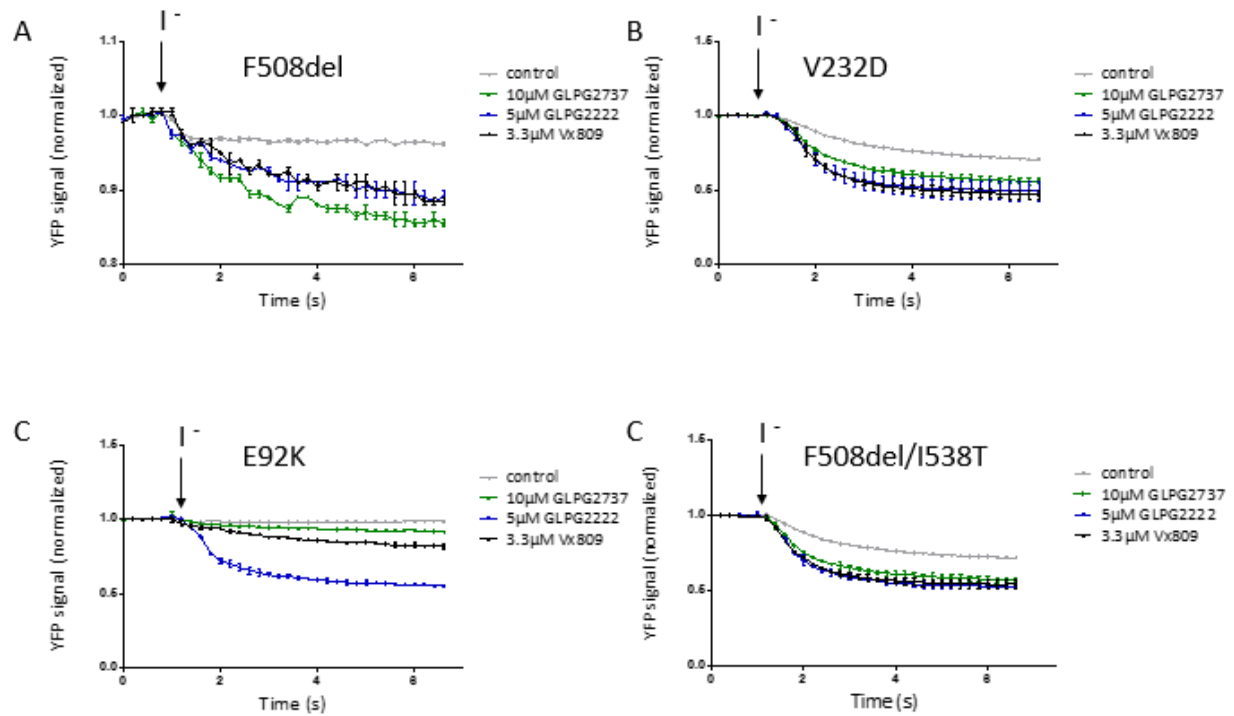

**Supplementary Figure 2:** YHA assay using CFTR mutant overexpression in HEK293 cells. Cells were incubated for 24 hours with either DMSO (grey); 10 μM GLPG2737 (green); 5 μM GLPG2222 (blue); 3.3 μM VX-809 (black). After washing, cells were triggered with forskolin (50 μM for F508del (A), V232D (B), E92K (C) and F508del/I539T (D)) and 0.5 μM potentiator and YFP fluorescence was measured. The YFP fluorescence was recorded during 7 s, starting directly before iodide injection. The CFTR channel function was expressed using the formula  $(1 - (\text{YFP fluorescence } 7 \text{ s after iodide addition (F)} / \text{YFP fluorescence before iodide addition (F}_0)))$

|        | EC <sub>50</sub> (nM) | normalised efficacy (%) | n |
|--------|-----------------------|-------------------------|---|
| Donor1 | 14.1 ± 4.5            | 171 ± 27                | 3 |
| Donor2 | 27.8 ± 26.9           | 208 ± 40                | 2 |
| Donor3 | 18.9 ± 7.4            | 172 ± 11                | 2 |
| Donor4 | 5.9                   | 187                     | 1 |

**Supplementary Table 1:** Dose dependent effect of GLPG2737 on F508del CFTR function. F508del/F508del HBE cells for different donors were incubated for 24 hours with a dose response of GLPG2737 in combination with 0.15 µM GLPG2222 and 1.5 µM GLPG3067. The potency (EC<sub>50</sub>) and normalized efficacy (with response of GLPG2222 and GLPG3067 set as 100%) in each donor are shown.
